# Supplementary material
Source: publisher site journal article supplement (https://compcytogen.pensoft.net/article/11395/download/suppl/35/)

**Fig. S1.** Total chromosome length for Cerrado angiosperms. \* Some predicted 2C-values based on a model generated with known 2C and TCL.

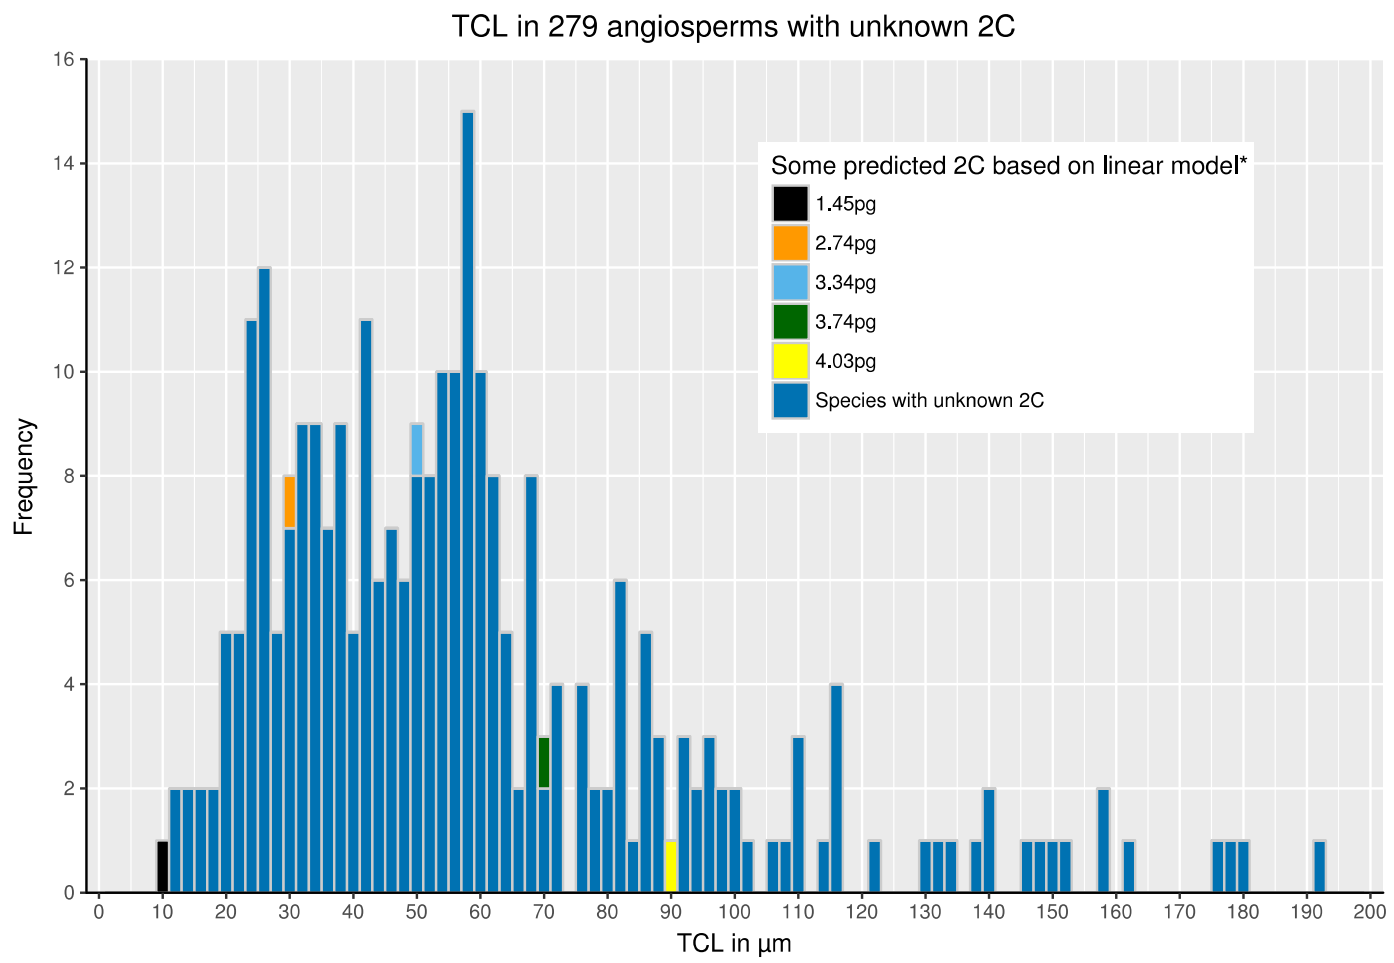

Supplement: Supplementary file
